# Supplementary material
Source: PubMed Central journal article supplement (PMC1142578)
Supplement: 7600645s1.pdf [file 7600645s1.pdf]

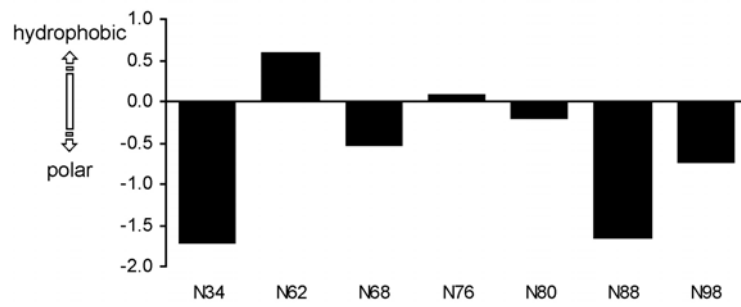

Sup\_1. Average hydrophobicity of residues in 12 Å radius. All residues whose CA atoms were within 12 Å of the CA atom of the residue turned into a glycosylated Asn were determined using the program MolMol. Their average Kyte-Doolittle value was calculated.
